# Supplementary material for: Xenopus tropicalis Genome Re-Scaffolding and Re-Annotation Reach the Resolution Required for In Vivo ChIA-PET Analysis
Source: PubMed Central journal article supplement (PMC4562602; doi:10.1371/journal.pone.0137526), 2015-09-08

**A** Nbr of cPETs: 297  
Average of estimated gap size: 2309 bp  
Median of estimated gap size: 2390 bp

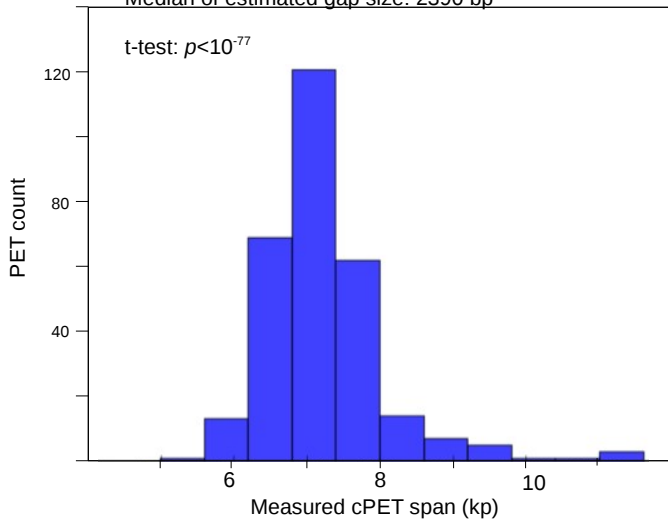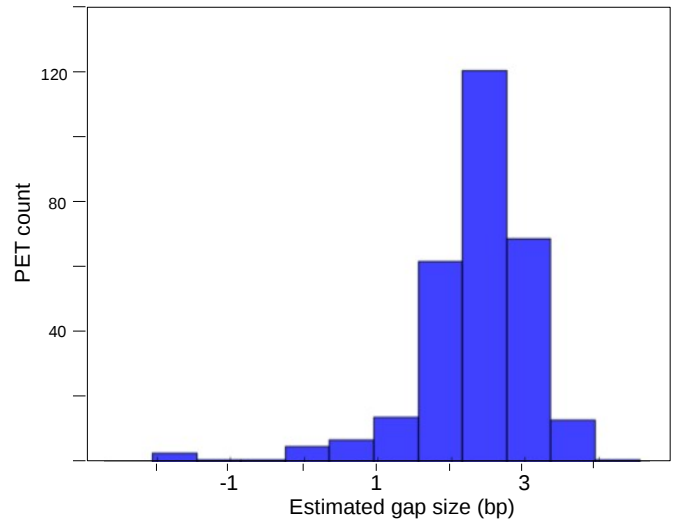

**B** Nbr of cPETs: 481  
Average of estimated gap size: 1172 bp  
Median of estimated gap size: 1169 bp

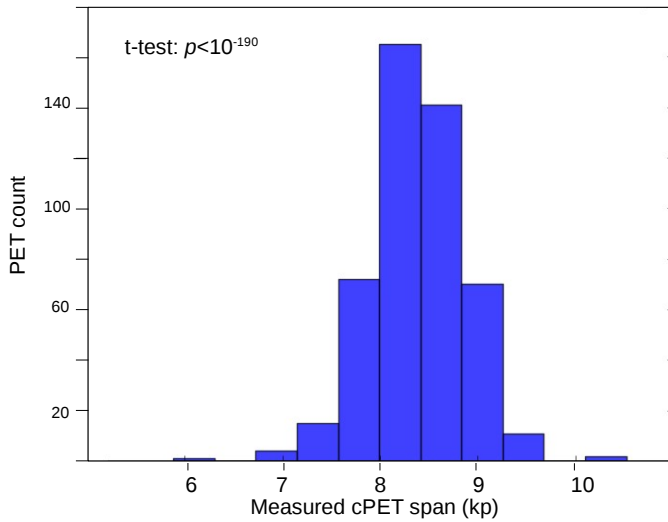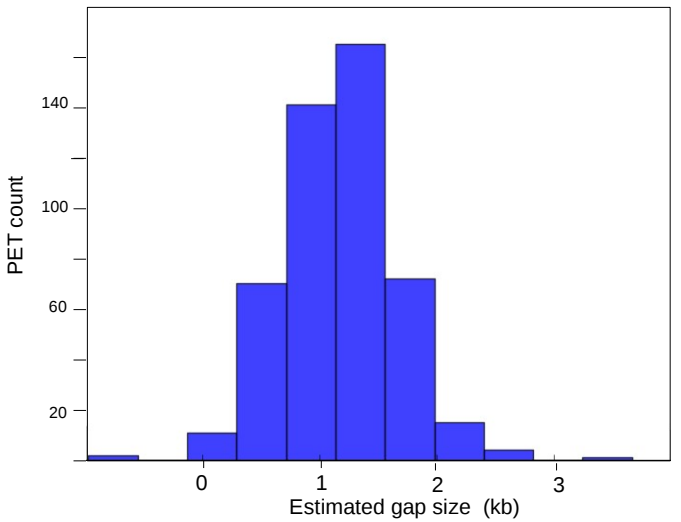

**C** Nbr of cPETs: 108  
Average of estimated gap size: 1344 bp  
Median of estimated gap size: 1435 bp

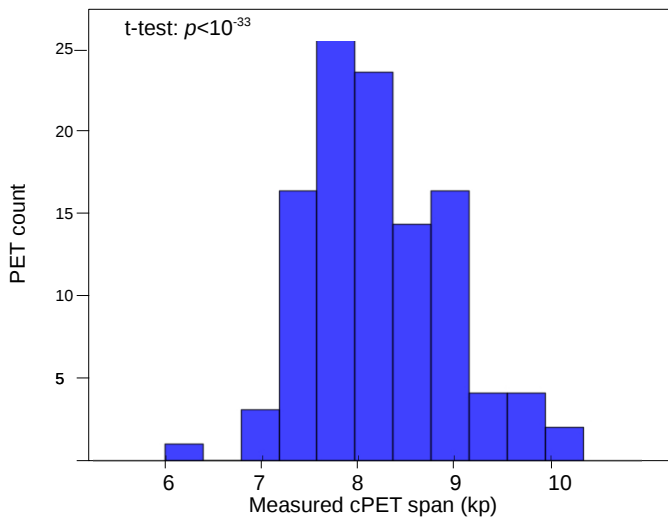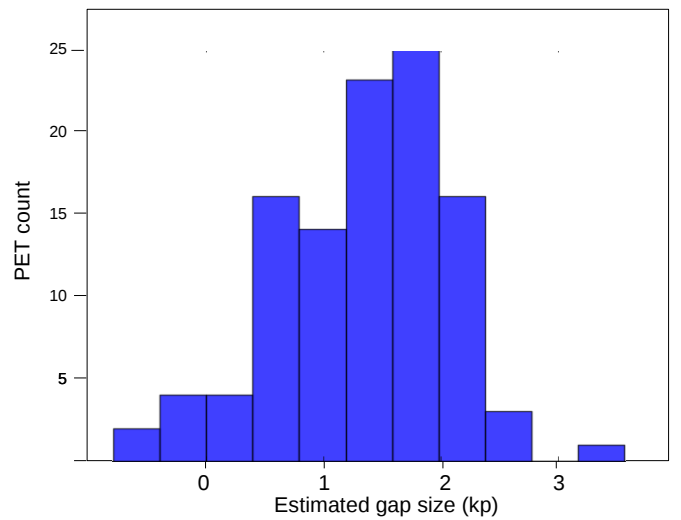

Supplement: pone.0137526.s004.pdf [file pone.0137526.s004.pdf]
