# Supplementary material for: Xenopus tropicalis Genome Re-Scaffolding and Re-Annotation Reach the Resolution Required for In Vivo ChIA-PET Analysis
Source: PubMed Central journal article supplement (PMC4562602; doi:10.1371/journal.pone.0137526), 2015-09-08

**A**  $\alpha$ : 67 cPETs  
 $\alpha$  average of estimated gap size: 3556 bp  
 $\alpha$  median of estimated gap size: 3628 bp  
t-test:  $p < 10^{-10}$

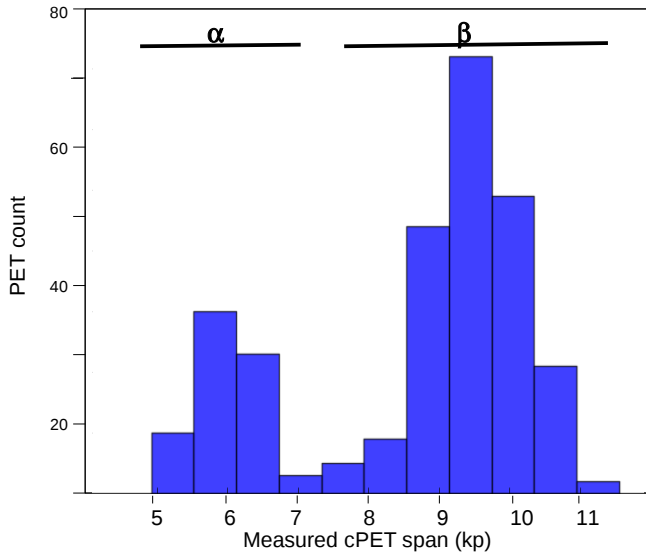

$\beta$ : 203 cPETs  
 $\beta$  average of estimated gap size: 67 bp  
 $\beta$  median of estimated gap size: 45 bp  
t-test:  $p = 0.733$

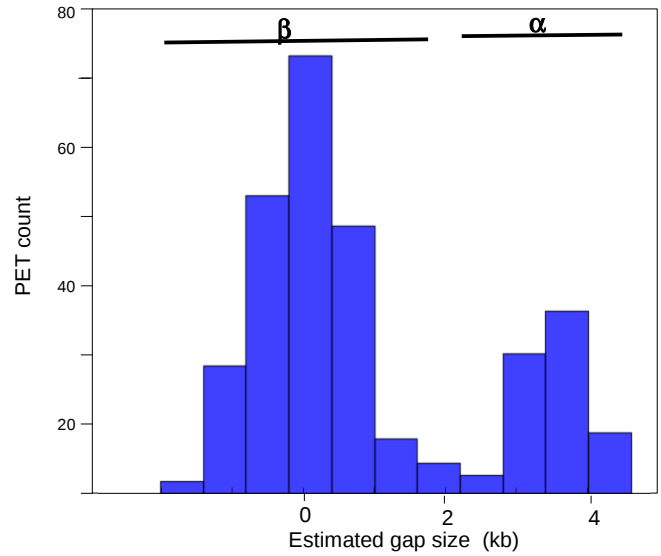

**B**  $\alpha$ : 97 cPETs  
 $\alpha$  average of estimated gap size: 388 bp  
 $\alpha$  median of estimated gap size: 396 bp  
t-test:  $p < 10^{-13}$

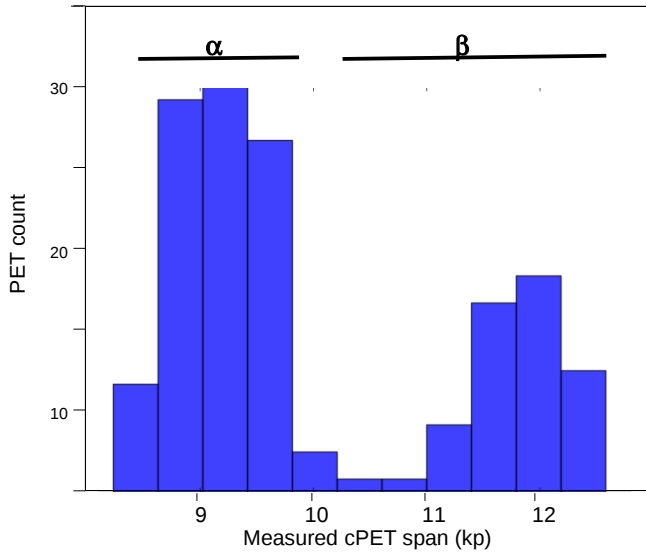

$\beta$ : 45 cPETs  
 $\beta$  average of estimated gap size: -2263 bp  
 $\beta$  median of estimated gap size: -2275 bp  
t-test:  $p < 10^{-35}$

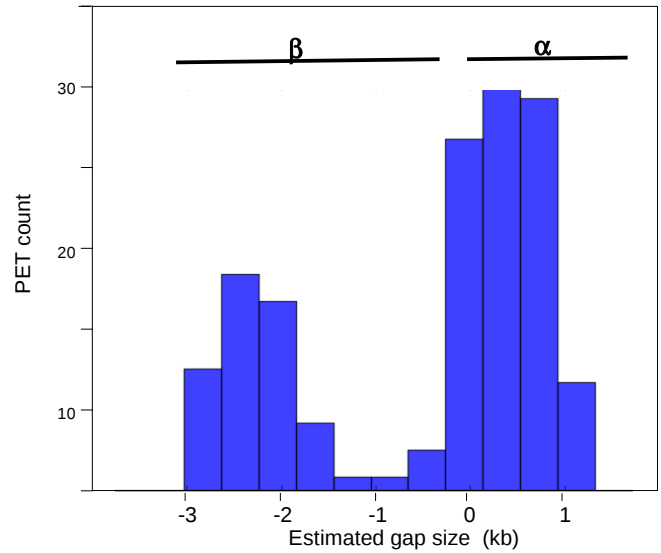

**C**  $\alpha$ : 116 cPETs  
 $\alpha$  average of estimated gap size: 1082 bp  
 $\alpha$  median of estimated gap size: 1050 bp  
t-test:  $p < 10^{-43}$

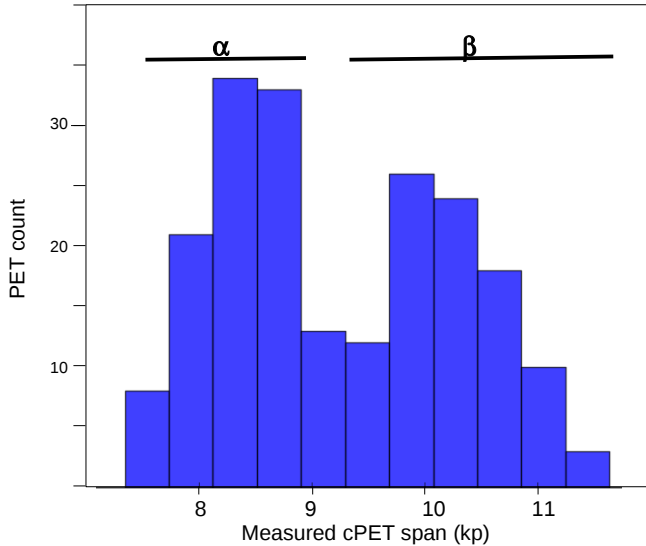

$\beta$ : 98 cPETs  
 $\beta$  average of estimated gap size: -652 bp  
 $\beta$  median of estimated gap size: -653 bp  
t-test:  $p < 10^{-21}$

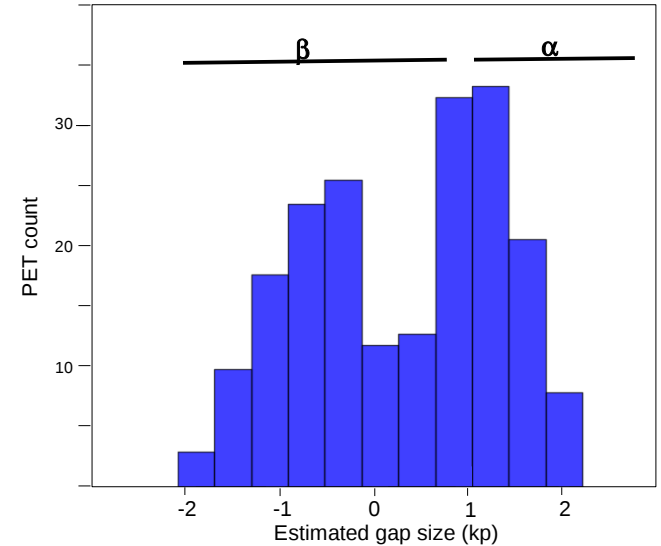

Supplement: pone.0137526.s005.pdf [file pone.0137526.s005.pdf]
