# Supplementary material for: Xenopus tropicalis Genome Re-Scaffolding and Re-Annotation Reach the Resolution Required for In Vivo ChIA-PET Analysis
Source: PubMed Central journal article supplement (PMC4562602; doi:10.1371/journal.pone.0137526), 2015-09-08

**A**

Nbr of cPETs: 353  
 Expected gap size: 116 bp  
 Average of estimated gap size: 897 bp  
 Median of estimated gap size: 929 bp

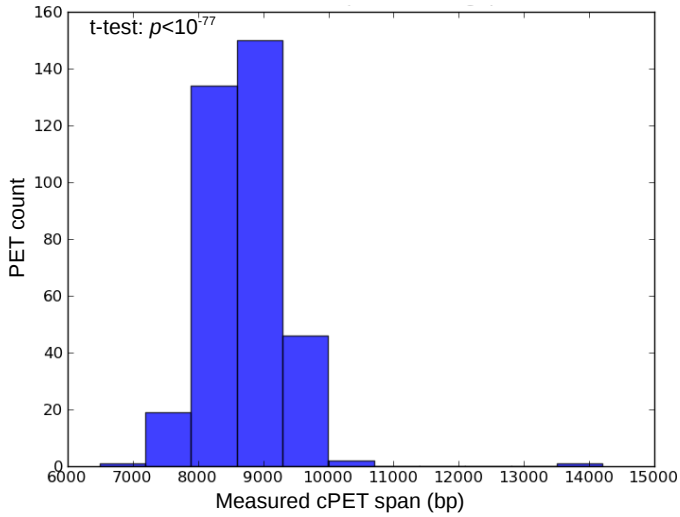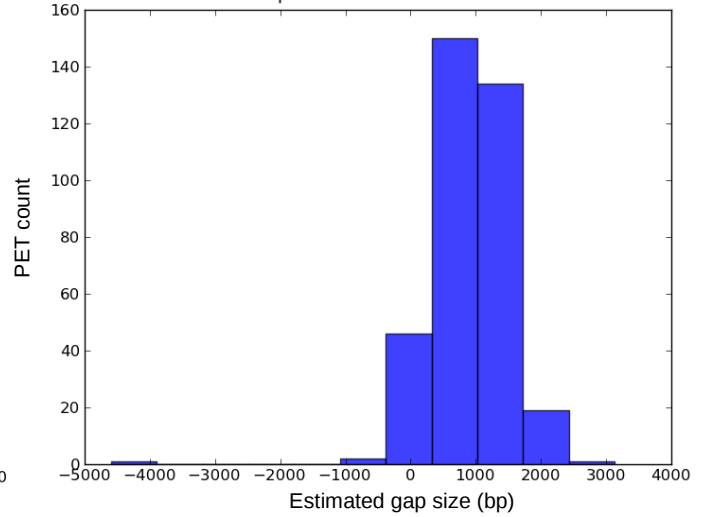**B**

Nbr of cPETs: 67  
 Expected gap size: 129 bp  
 Average of estimated gap size: -900 bp  
 Median of estimated gap size: -825 bp

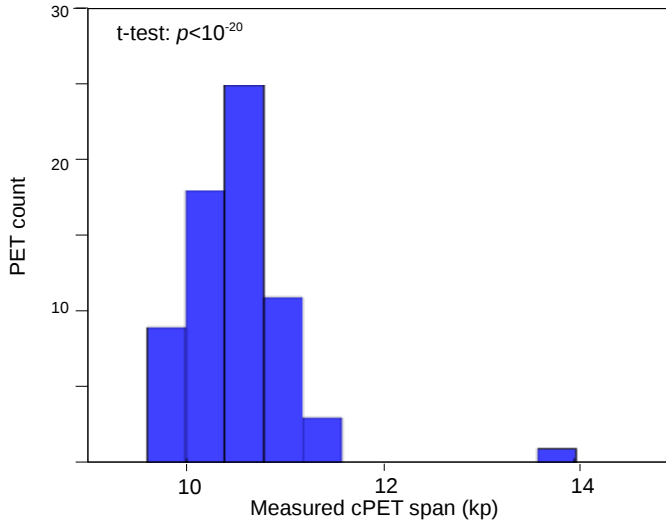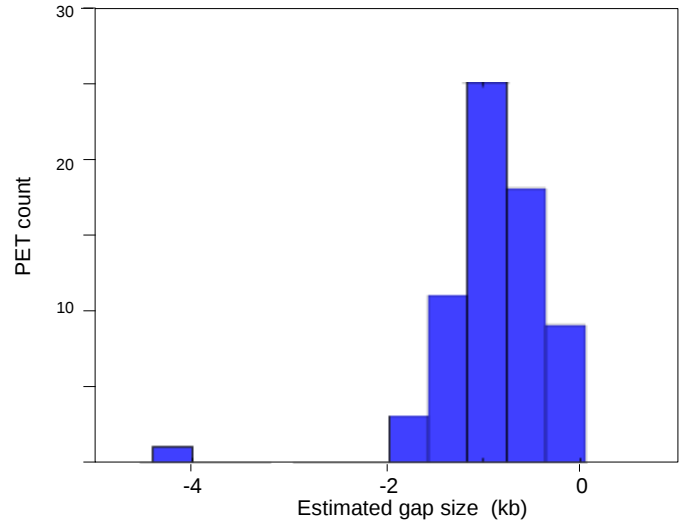**C**

Nbr of cPETs: 78  
 Annotated gap size: 635 bp  
 Average of estimated gap size: 2354 bp  
 Median of estimated gap size: 2391 bp

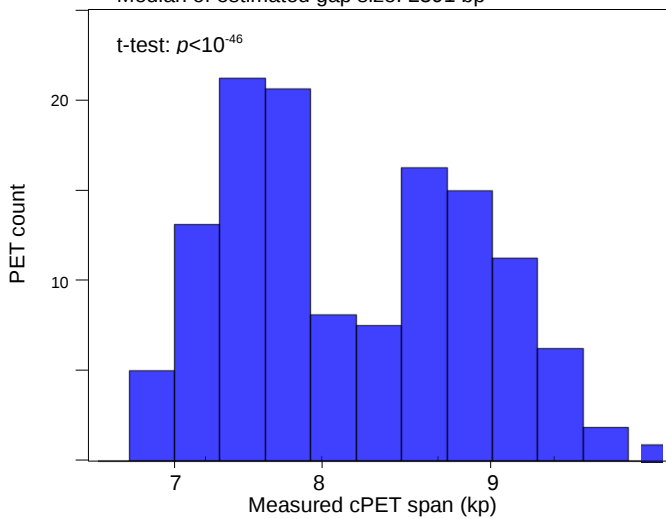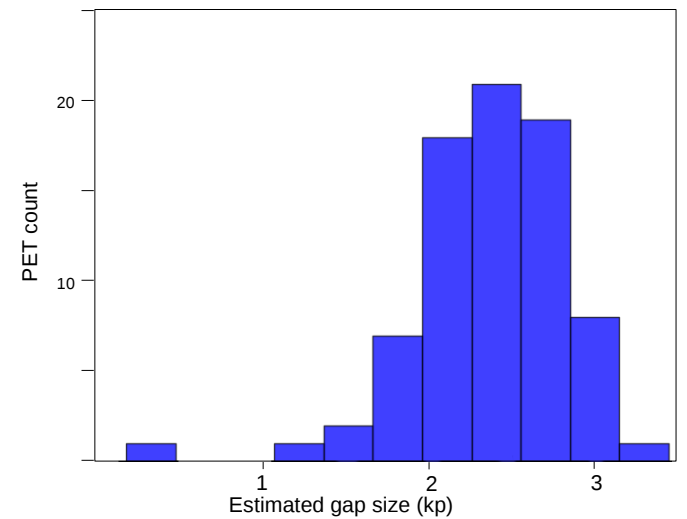

Supplement: pone.0137526.s006.pdf [file pone.0137526.s006.pdf]
