# Supplementary material for: Xenopus tropicalis Genome Re-Scaffolding and Re-Annotation Reach the Resolution Required for In Vivo ChIA-PET Analysis
Source: PubMed Central journal article supplement (PMC4562602; doi:10.1371/journal.pone.0137526), 2015-09-08

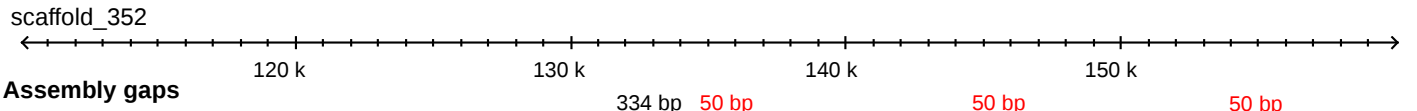

dPETs clusters - IXT010

To scaffold\_1096

To scaffold\_16668

dPETs clusters - IXT011

To scaffold\_1096

cPETs clusters - IXT010

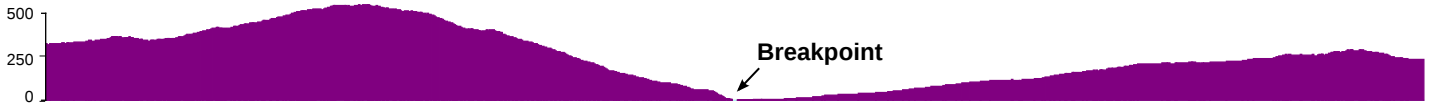

cPETs clusters - IXT011

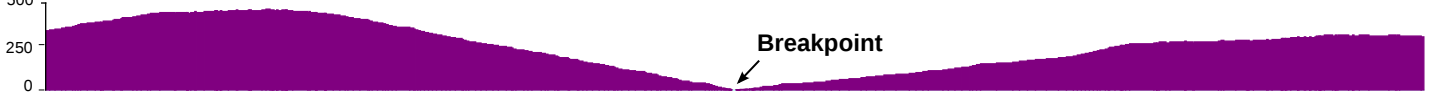

scaffold\_241

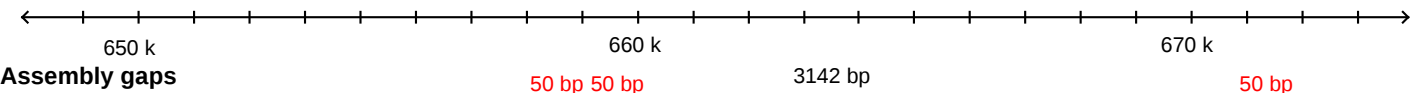

dPETs clusters - IXT010

To scaffold\_840

To scaffold\_23

dPETs clusters - IXT011

To scaffold\_840

To scaffold\_23

cPETs clusters - IXT010

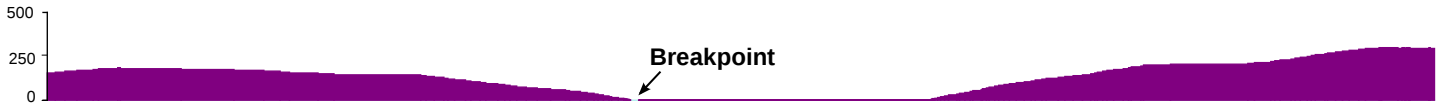

cPETs clusters - IXT011

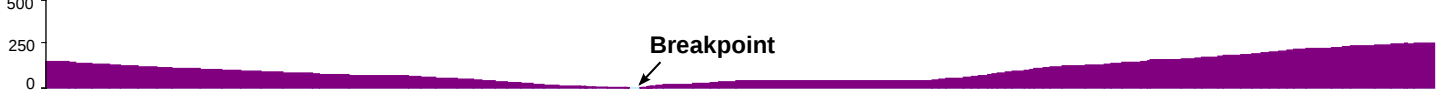

Supplement: pone.0137526.s008.pdf [file pone.0137526.s008.pdf]
