# Supplementary material for: Xenopus tropicalis Genome Re-Scaffolding and Re-Annotation Reach the Resolution Required for In Vivo ChIA-PET Analysis
Source: PubMed Central journal article supplement (PMC4562602; doi:10.1371/journal.pone.0137526), 2015-09-08

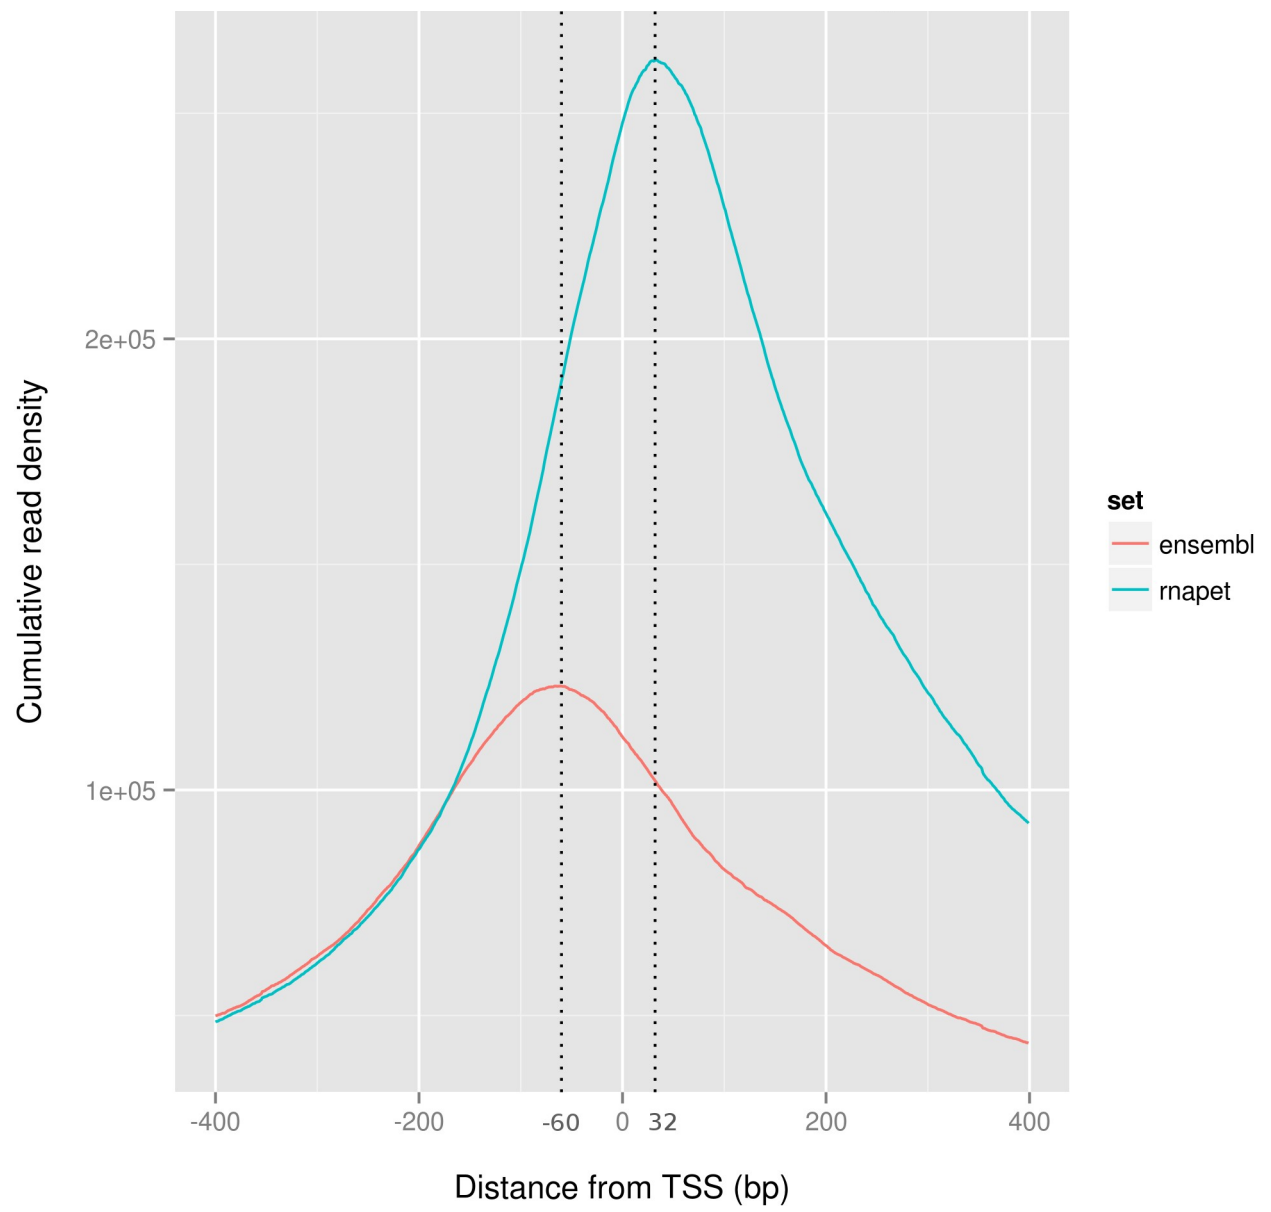

Supplement: pone.0137526.s026.pdf [file pone.0137526.s026.pdf]
