# Supplementary material for: Xenopus tropicalis Genome Re-Scaffolding and Re-Annotation Reach the Resolution Required for In Vivo ChIA-PET Analysis
Source: PLoS One. 2015 Sep 8;10(9):e0137526. doi: 10.1371/journal.pone.0137526 (PMC4562602; doi:10.1371/journal.pone.0137526)
Supplement: S3 Table — (XLS) [file pone.0137526.s029.xls]

## Sheet: Feuille1
	Use	Forward Primer	Reverse Primer
F4-Bcl6-BS1	ChIP-qPCR	CTCCACCTAACCCCCCTAGCT	CAGTGCCATCACTTACCTCATTTT
F4-Bcl6-BS2	ChIP-qPCR	CTGGATGCCTGCCAAAGG	GGGCAGTTAGAATAGTATGAATGCAA
F4-Bcl6-BS3	ChIP-qPCR	CAGAGCTGGCCTCAGATGAAC	CAGAAGAACACGGCTCAACCT
F4-Bcl6-BS4	ChIP-qPCR	GCAGAGATCAGAACGGCTCAT	CTCGTTTCACCCCTTGCATAC
F4-Bcl6-TSS	ChIP-qPCR	CGGCTGCGTGACACTCAA	ACAGGGCTCAATTCTCGGAAT
F4-Bcl6-RT	RT-qPCR	GTGGACACCTGCCAGAGGTT	CTGGCGGTAACATTGCTCTTC
F4-Ipp-RT	RT-qPCR	AATCTTCAGCCCATGCCTACA	CCCGCCAGTGTTTATCTGAAC
F4-Tprg1-RT	RT-qPCR	CTGTGCCACCCTACCTTATGAGA	TCTTCATTGGCCTGCTCAAA
F5-RT	RT-qPCR	TTAGGCGGGACTGACTTTGGT	ACTTTTCTCACTTGCTCGGTTAGC
F5-BS	ChIP-qPCR	CCACCCTAAATCGTGCATAGC	TCCAGCGCAGCCTGAGA
F6-klf13-BS	ChIP-qPCR	CCGGCACATACAGCAATGAC	CGGAACGTAGACTGCACCTAAA
F6-klf13-TSS	ChIP-qPCR	CTGCTCTGCCCAGGATGTG	GGCGTGGCCTGGAGAAA
F6-klf13-RT	RT-qPCR	GAGAAGGCAGAGTGTGGCATTA	GGCTCCCTATCCGCCTCAT
F6-ulk3-INTER	ChIP-qPCR	AGATTTTGGCTTTGCTCAGCAT	CAGGAGCCATGTAAAGAGGTGAT
F6-ulk3-TSS	ChIP-qPCR	AAGCTGTGTAACGCTCCGTGA	AGCACCGTGCCCCTCATAT
F6-ulk3-RT	RT-qPCR	GGTCATATGCCACCGTCTACAA	ACACATTTAATGGCCACGACTTC
